# Supplementary material for: FDXR drives primary and endocrine-resistant tumor cell growth in ER+ breast cancer via CPT1A-mediated fatty acid oxidation
Source: Front Oncol. 2023 May 3;13:1105117. doi: 10.3389/fonc.2023.1105117 (PMC10189134; doi:10.3389/fonc.2023.1105117)
Supplement: Supplementary file 9 [file Table_1.xlsx]

## Sheet: Analysis-Metab
Metabolite	II_Scr_1	II_Scr_2	II_Scr_3	II_434_1	II_434_2	II_434_3
N2-Formyl-N1-(5-phospho-D-ribosyl)glycinamide	70564.8	184074	54124.4	1000	1000	1000
N-acetyl-L-cystathionine	64214.5	63814.8	35858.5	13225.8	1000	13792.7
glutathione	4.69834e+07	3.98832e+07	3.37472e+07	8.96163e+06	9.97181e+06	9.49845e+06
N-Carbamoyl-L-aspartate	1.47672e+06	1.31869e+06	1.36265e+06	486195	550134	621312
(S)-dihydroorotate	716603	713931	458428	325631	289491	239680
trans-Hexadec-2-enoyl carnitine	9.92728e+06	1.91541e+07	1.71039e+07	6.77846e+06	7.55746e+06	7.33186e+06
lauroyl carnitine	1.28332e+07	1.75725e+07	1.68642e+07	6.8509e+06	8.54295e+06	7.83664e+06
octanoyl carnitine/L-Octanoylcarnitine	2.14271e+07	2.65001e+07	2.59753e+07	1.11067e+07	1.3097e+07	1.22004e+07
tetradecanoyl carnitine(myristoyl carnitine)	2.23373e+07	3.68465e+07	3.20947e+07	1.41845e+07	1.63151e+07	1.5578e+07
5,6-dihydrouracil/L-3-Cyanoalanine	697509	804301	550176	363257	323726	351772
Sulfate derivative of norepinephrine	6.03058e+06	2.91466e+06	7.4935e+06	2.62474e+06	3.5177e+06	2.57557e+06
decanoyl carnitine	1.32679e+07	1.64387e+07	1.59435e+07	7.19776e+06	9.08267e+06	8.74287e+06
tetradecenoyl carnitine	3.2941e+06	4.01941e+06	5.08861e+06	2.22494e+06	2.67325e+06	2.24636e+06
3-Hydroxybutyrylcarnitine	2.60471e+07	2.54094e+07	2.71619e+07	1.49017e+07	1.57929e+07	1.59394e+07
N(omega)-(L-Arginino)succinate	6.88957e+06	6.55624e+06	7.46197e+06	4.18711e+06	3.99469e+06	4.24179e+06
Linoleyl carnitine/Linoelaidyl carnitine	931207	1.81512e+06	1.70149e+06	908954	982917	936896
decenoyl carnitine	774153	888745	952104	474110	600211	599306
3-hydroxyhexadecanoylcarnitine	4.10252e+06	5.77616e+06	5.26877e+06	2.80306e+06	3.63253e+06	3.27717e+06
IMP	725824	773548	620250	417254	426463	520565
fructoselysine 3-phosphate	148998	131420	253899	124426	108965	110549
glutaryl carnitine	4.288e+07	4.83639e+07	5.38841e+07	2.60018e+07	4.60768e+07	2.39437e+07
octenoyl carnitine	1.22919e+06	1.35306e+06	1.46735e+06	825153	932717	933530
Sedoheptulose 7-phosphate	4.5017e+06	4.80816e+06	4.61193e+06	3.11281e+06	3.1527e+06	3.09729e+06
2-keto-3-deoxy-D-glycero-D-galactononic acid 9-phosphate	725824	773548	560073	417254	447300	520565
butyryl carnitine	1226089489	1309404675	1353682287	8.38292e+08	900642846	884545443
6-Phosphogluconic acid	3.1316e+06	4.00159e+06	3.5681e+06	2.5396e+06	2.6299e+06	2.12073e+06
O-acetylcarnitine	801842042	8.50123e+08	7.73385e+08	5.2778e+08	5.92793e+08	5.38105e+08
stearate	1.54424e+08	3.87869e+08	2.12665e+08	1.48287e+08	171902884	1.97849e+08
fructoseglycine	5.24411e+07	5.79896e+07	6.57988e+07	3.97158e+07	4.6332e+07	3.54328e+07
S-Adenosyl-L-homocysteine	1.72779e+06	1.44366e+06	1.62128e+06	1.1839e+06	1.30122e+06	841237
1-methylnicotinamide	156522	181815	205189	100733	123083	157332
L-palmitoylcarnitine	2.58649e+07	4.50283e+07	3.58463e+07	2.3265e+07	2.72831e+07	2.49077e+07
S-(2-Methylpropanoyl)-dihydrolipoamide	1.33641e+08	1.39362e+08	1.7086e+08	100675696	1.15482e+08	9.90467e+07
GSSG	1.88283e+08	1.61844e+08	1.85741e+08	1.17654e+08	1.26567e+08	136728823
dUDP	1.00059e+06	904792	1.16343e+06	696198	774064	717994
Elaidic carnitine/Vaccenyl carnitine	2.12607e+07	4.04333e+07	3.69764e+07	2.19225e+07	2.435e+07	2.40915e+07
gama-L-glutamyl-L-alanine/5-L-Glutamyl-L-alanine-1	3.87688e+07	3.71127e+07	3.89388e+07	2.66152e+07	2.78868e+07	2.7459e+07
CMP-N-acetyl-beta-neuraminate	1.73421e+07	1.42415e+07	1.69061e+07	1.0974e+07	1.17718e+07	1.23249e+07
isoputreanine/putreanine	8.58919e+07	8.77386e+07	8.65419e+07	6.31863e+07	6.13796e+07	6.5134e+07
dIMP	1.81449e+06	1.56506e+06	1.49253e+06	1.08885e+06	1.09157e+06	1.39426e+06
fructosyllysine	2.04248e+07	2.64277e+07	2.80135e+07	1.58631e+07	2.55875e+07	1.40391e+07
N-acetylneuraminic acid	4.2885e+07	4.69732e+07	5.57629e+07	3.66009e+07	4.11175e+07	3.12212e+07
N-acetyl-L-glutamate	2.01631e+07	2.07352e+07	2.36257e+07	1.60106e+07	1.63337e+07	1.60088e+07
5,6-dihydrothymine	4.02953e+07	3.93099e+07	4.1747e+07	3.06706e+07	3.0033e+07	3.17594e+07
propionyl-carnitine	5.32491e+08	5.31648e+08	4.87833e+08	4.07303e+08	4.02574e+08	3.74612e+08
NeuNGc	127633	146161	112356	107202	87864.2	100906
2-acetamido-5-oxopentanoate	2.99845e+06	3.01618e+06	3.73564e+06	2.59912e+06	2.91081e+06	1.9883e+06
5-Amino-1-(5-Phospho-D-ribosyl)imidazole-4-carboxamide	681576	1.2092e+06	928637	933865	677942	561237
phytanic acid/arachidic acid	1.68849e+06	4.16322e+06	2.54221e+06	2.16115e+06	2.26645e+06	2.06696e+06
omega hydroxy tetradecanoate (n-C14:0)	2.52598e+06	3.96041e+06	2.8991e+06	2.35938e+06	2.37923e+06	2.52751e+06
L-Fucose 1-phosphate	2.98224e+06	2.98351e+06	2.04689e+06	2.41586e+06	1.9361e+06	1.8737e+06
pseudoecgonine/ecgonine	9.79238e+06	9.76583e+06	9.85587e+06	7.45248e+06	7.82805e+06	7.62257e+06
C4H9NO2(4)	1.41815e+07	1.41852e+07	1.43238e+07	1.10831e+07	1.10456e+07	1.13785e+07
N1-(5-Phospho-D-ribosyl)glycinamide	98104.6	116317	249854	90081.8	160787	114065
L-cysteine	405150	164260	348719	186255	300613	234851
2-keto-4-methylthiobutyrate	437430	481378	413545	405440	309873	339765
Dihydroxyacetone phosphate	1.905e+07	2.0019e+07	2.02581e+07	1.53898e+07	1.61443e+07	1.5493e+07
omega hydroxy dodecanoate (n-C12:0)	4.49468e+06	4.95498e+06	4.9376e+06	4.07409e+06	3.75064e+06	3.59918e+06
thiosulfate	3.83273e+06	3.22776e+06	2.82713e+06	3.25289e+06	2.50173e+06	2.0994e+06
Methylimidazoleacetic acid	4.6403e+07	4.39096e+07	4.62632e+07	3.51109e+07	3.66862e+07	3.71268e+07
N-Acetylneuraminate 9-phosphate	797932	889128	966050	877510	523540	728305
fumarate	6.18206e+07	6.42763e+07	6.4559e+07	5.12005e+07	4.98018e+07	5.34081e+07
N-Formimidoyl-L-glutamate	5.30846e+06	5.84392e+06	4.88672e+06	4.35514e+06	4.32818e+06	4.32651e+06
(R)-mevalonate	6.03098e+06	5.64124e+06	5.42089e+06	5.01749e+06	4.48454e+06	4.43648e+06
sedoheptulose 1,7-bisphosphate	355683	343487	341137	390997	275600	182213
GDP	1.50848e+07	1.6636e+07	1.50549e+07	1.54683e+07	1.3133e+07	9.56462e+06
Deoxyuridine	731596	958841	956825	785182	726029	650435
5-Methylthioadenosine	172415452	2.24653e+08	2.12696e+08	1.75754e+08	1.72176e+08	1.50546e+08
Deoxyinosine	5.01869e+06	5.45508e+06	5.3358e+06	4.08587e+06	4.3764e+06	4.48378e+06
malate(2-)	3.97754e+08	4.16303e+08	4.12955e+08	3.33834e+08	3.33829e+08	3.38278e+08
Urocanate	8.95906e+06	4.45167e+06	5.89995e+06	6.57444e+06	5.16613e+06	4.09093e+06
UDP-alpha-D-xylose	1.58527e+06	1.79481e+06	1.63268e+06	1.50417e+06	1.50229e+06	1.12774e+06
3-Ureidoisobutyrate/Glycylsarcosine	1085045054	1051048825	1028342476	9.08725e+08	8.39513e+08	8.68749e+08
L-glutamine	1107250511	1077846016	1056408240	9.31071e+08	8.65633e+08	8.87692e+08
Phosphodimethylethanolamine	6.87801e+07	6.47409e+07	6.52029e+07	5.67367e+07	5.29164e+07	5.49342e+07
tiglyl carnitine	7.36361e+07	7.92052e+07	8.2343e+07	5.98753e+07	6.54958e+07	69601020
Flavin adenine dinucleotide oxidized	277626	244485	247099	261696	161132	215048
thiamine	1.52897e+07	1.05392e+07	1.41462e+07	1.02632e+07	1.20521e+07	1.09168e+07
alpha-linolenyl carnitine/gamma-linolenyl carnitine	47711.7	106730	96497.8	78261.2	72719.4	57686.6
4-Imidazolone-5-propanoate	2.64301e+06	2.95493e+06	2.9379e+06	2.24359e+06	2.30701e+06	2.57386e+06
5-Methylthio-5-deoxy-D-ribulose 1-phosphate/5-Methylthio-5-deoxy-D-ribose 1-phosphate	491072	484731	322150	376015	288591	426985
2-deoxy-D-ribose	599317	604840	642766	510075	575474	471399
Ureidopropionic acid/Glycyl-glycine	1.51557e+08	1.45232e+08	152607273	1.30598e+08	1.20298e+08	1.28077e+08
acetylcarnosine	23964.5	44620.9	15651.1	23129.9	26255.5	21679.8
Thymidine	1.87237e+06	1.77707e+06	2.29273e+06	1.62899e+06	1.76222e+06	1.62258e+06
GTP	2.71308e+07	2.70078e+07	2.60754e+07	2.57299e+07	22893309	1.91682e+07
margarate	3.26197e+07	5.79121e+07	4.0906e+07	3.32592e+07	4.12492e+07	3.67789e+07
L-asparagine	1.4977e+08	1.42744e+08	1.50339e+08	1.29364e+08	1.18648e+08	1.26982e+08
spermidine dialdehyde-2	2.46136e+07	2.47574e+07	2.36851e+07	2.06738e+07	2.06917e+07	2.0753e+07
D-Glucosamine	5.75945e+06	5.78838e+06	5.75839e+06	5.1176e+06	4.99229e+06	4.63078e+06
w-hydroxydecanoicacid	8.37732e+06	8.31659e+06	8.84633e+06	7.83299e+06	7.20698e+06	6.79e+06
myristate	1.95216e+08	3.35361e+08	2.51504e+08	2.07382e+08	2.36025e+08	2.25964e+08
2-deoxycytidine	1.33597e+07	1.58572e+07	1.98644e+07	1.29991e+07	1.48433e+07	1.42859e+07
G6P/F6P	2.19544e+07	2.43201e+07	2.27087e+07	1.97659e+07	2.04599e+07	1.9445e+07
Glycyl-phenylalanine	43179.7	53631.1	71625.8	44547.8	60435.3	40735.6
L-glutamate	7.934e+08	8.35432e+08	8.74643e+08	7.12017e+08	7.06045e+08	7.49148e+08
L-4-hydroxyglutamate semialdehyde	7.93947e+08	8.35873e+08	8.75147e+08	7.12635e+08	7.06495e+08	7.49596e+08
3-hydroxy-isovaleryl carnitine	3.50165e+07	3.62753e+07	3.59484e+07	3.08658e+07	3.26374e+07	2.99363e+07
palmitate	6.78047e+08	1004281047	7.44595e+08	6.98058e+08	7.55163e+08	6.71285e+08
Glycerol 3-phosphate	9.04991e+07	8.92299e+07	9.43617e+07	8.09791e+07	7.71832e+07	8.18124e+07
3-hydroxyhexadecenoylcarnitine	2.07251e+06	3.02434e+06	2.83464e+06	2.1979e+06	2.42727e+06	2.35042e+06
omega hydroxy hexadecanoate (n-C16:0)	1.43917e+07	2.16347e+07	1.67081e+07	1.61794e+07	1.39153e+07	1.63516e+07
5-Hydroxyisourate	1.69221e+06	1.54966e+06	1.69641e+06	1.39416e+06	1.55804e+06	1.40861e+06
cytosine	9.52053e+07	1.16106e+08	1.51324e+08	1.06146e+08	1.12604e+08	1.01886e+08
(R)-carnitine	2165715693	2152223037	2587606360	1914926942	2065651409	2125206492
lactate	5563704071	5405504411	5595951450	4759414459	4958230854	4981443779
L-histidine	9.48145e+07	9.27493e+07	8.91649e+07	8.75189e+07	7.88838e+07	7.93556e+07
tetradecenoate (n-C14:1)	4.40307e+06	4.56056e+06	4.80249e+06	4.09425e+06	3.85286e+06	4.29666e+06
4(R)-hydroxy-dodec-6Z-enoate/4(S)-hydroxy-dodec-6Z-enoate	6.37743e+06	6.16455e+06	6.793e+06	6.33132e+06	5.56826e+06	5.31874e+06
ribose-phosphate	7.20643e+06	7.3112e+06	6.5255e+06	7.22527e+06	5.54972e+06	6.14223e+06
L-Alanyl-L-leucine	1.93431e+07	2.15241e+07	2.1605e+07	1.82725e+07	1.91053e+07	1.87903e+07
N-Acetylmethionine	1.0726e+06	1.16872e+06	1.00577e+06	906276	1.07834e+06	949547
citr_L[e]	4.71768e+06	4.70023e+06	4.57509e+06	4.52572e+06	4.08534e+06	4.09674e+06
itaconate/Mesaconate	3.08408e+07	3.09053e+07	3.18111e+07	2.86048e+07	2.84963e+07	2.81943e+07
pendtadenoyl carnitine	1.43682e+06	2.24455e+06	1.9871e+06	1.57769e+06	1.81735e+06	1.77728e+06
palmitoleate	2.57103e+07	3.13193e+07	3.20599e+07	2.76331e+07	2.5362e+07	2.84251e+07
L-methionine	2.15194e+08	2.14615e+08	2.00839e+08	1.95079e+08	1.90154e+08	1.92099e+08
L-threonine	6.33128e+07	6.37523e+07	5.95477e+07	5.96105e+07	5.57683e+07	5.56136e+07
cis-aconitate	5.02551e+07	5.54395e+07	5.86412e+07	4.80191e+07	5.16037e+07	5.12605e+07
glycine	1.02341e+07	9.9302e+06	1.00061e+07	9.04975e+06	9.36832e+06	9.32413e+06
AMP	1.47396e+07	1.55481e+07	1.58116e+07	1.45438e+07	1.48231e+07	1.31762e+07
L-alanine	6.98725e+07	7.09853e+07	7.18264e+07	6.62979e+07	6.52292e+07	6.53155e+07
phenylacetaldehyde	2.18952e+06	2.08629e+06	2.22221e+06	1.97988e+06	2.01829e+06	2.01707e+06
oxalatosuccinate	182380	106249	79614.9	113011	82164.3	146604
NADH	1.65781e+06	1.44928e+06	903189	1.4339e+06	1.29418e+06	994798
L-cysteate	4.81323e+06	7.11872e+06	5.90223e+06	6.49141e+06	5.03756e+06	5.06516e+06
N-acetyl-seryl-aspartate	3.59337e+06	3.2277e+06	3.18173e+06	3.33854e+06	2.94879e+06	3.02929e+06
Pyridoxal	5.16651e+06	5.85864e+06	6.6031e+06	5.28293e+06	6.43251e+06	4.71692e+06
N-phosphocreatinate	8.73803e+07	9.04924e+07	9.59704e+07	8.30615e+07	8.19875e+07	9.02289e+07
L-serine	4.11126e+07	3.98652e+07	4.07449e+07	3.92305e+07	3.65068e+07	3.78148e+07
3-methyl-2-oxopentanoate/4-methyl-2-oxopentanoate(ketoleucine)	2.69533e+08	297238694	2.88255e+08	271849872	2.68546e+08	2.60105e+08
ADP-mannose/GDP-L-fucose/ADP alpha-D-glucoside	5.31343e+06	5.22605e+06	5.24773e+06	5.57604e+06	5.35397e+06	3.8812e+06
C20H34O4(4)	1.37906e+06	2.30323e+06	1.89946e+06	1.5852e+06	1.83757e+06	1.81588e+06
7,9-dihydro-1H-purine-2688(3H)-trione	6.24525e+07	6.10326e+07	5.99587e+07	5.71328e+07	5.91813e+07	5.58722e+07
gulonate	8.44873e+07	8.05137e+07	7.86715e+07	7.88926e+07	7.64177e+07	7.54359e+07
C6H11NO3(4)	8.8168e+06	9.06951e+06	9.37578e+06	8.77256e+06	8.86693e+06	8.17855e+06
5-Methoxyindoleacetate	4.89636e+06	5.77398e+06	5.841e+06	5.46188e+06	5.2519e+06	4.95345e+06
stearoylcarnitine	1.23874e+06	2.43449e+06	1.36275e+06	1.36862e+06	1.59003e+06	1.82086e+06
NN-dimethylglycine	2.79377e+06	2.76466e+06	2.96774e+06	2.63637e+06	2.89701e+06	2.5662e+06
myo-inositol	3.55039e+08	360015450	3.77313e+08	3.45368e+08	3.50877e+08	3.43031e+08
2-aminoacrylic acid	1.2795e+07	1.18222e+07	1.30355e+07	1.19379e+07	1.15707e+07	1.23142e+07
CDP-ethanolamine	2.00397e+06	1.68614e+06	1.99948e+06	1.73222e+06	1.67914e+06	2.00263e+06
C6H12O6(5)	3.55988e+08	360904761	3.78332e+08	3.46435e+08	3.51748e+08	3.43993e+08
C9H13N5O3(4)	3.328e+06	2.9908e+06	3.03623e+06	3.00376e+06	2.92818e+06	2.98843e+06
thymine/imidazol-4-ylacetate	2.31057e+07	2.211e+07	2.37574e+07	2.42964e+07	2.16516e+07	1.99164e+07
benzoate	3.16912e+07	3.07344e+07	3.07449e+07	2.97507e+07	3.014e+07	2.93036e+07
coumarin	1.77705e+07	1.73935e+07	1.73058e+07	1.73145e+07	1.67151e+07	1.63226e+07
ADP	2.06698e+08	233571456	2.07228e+08	2.17633e+08	2.0627e+08	197797274
L-tryptophan	4.19236e+08	4.24126e+08	4.38926e+08	4.03673e+08	411244478	4.17037e+08
3alpha-7alpha-12alpha-Trihydroxy-5beta-cholestanoate/3alpha-7alpha-12alpha-25-tetrahydroxy-5beta-cholestane-24-one	450460	494367	465452	435851	480757	438560
D-Erythrose 4-phosphate	141027	151801	138617	177607	99776	137328
acetamidopropanal	1721285065	1633839759	1655759751	1593043013	1602279335	1621754498
L-proline	1721285065	1633839759	1655759751	1593043013	1602279335	1621754498
C9H8O3(3)	6.51944e+07	6.21578e+07	6.20523e+07	6.23316e+07	6.02983e+07	5.98299e+07
L-isoleucine/L-leucine	2452667322	2512897784	2566102885	2401853714	2434594509	2439317335
creatine	2201495429	2253489880	2293446626	2180987741	2181328058	2160245827
uracil	8.35469e+06	8.70736e+06	8.82982e+06	8.10557e+06	8.52644e+06	8.40584e+06
L-arabinitol/xylitol/D-ribitol	1.4565e+07	1.4699e+07	1.38312e+07	1.39237e+07	1.38785e+07	1.38864e+07
heptadecanoyl carnitine	1.34445e+06	2.41253e+06	1.95593e+06	1.78417e+06	1.91761e+06	1.82721e+06
pentadecanoate	4.12639e+07	6.36363e+07	5.2705e+07	4.67987e+07	5.34108e+07	5.2645e+07
citrate/isocitrate	2303513314	2509855702	2588004778	2384357116	2442611837	2363534982
aspartate	1.13529e+08	111297038	1.21531e+08	108158820	1.09453e+08	1.19228e+08
GDP-D-mannose	3.01344e+06	2.89004e+06	2.96957e+06	3.39405e+06	2.88988e+06	2.37581e+06
3-Keto-beta-D-galactose/L-Gulonolactone	1.59808e+06	1.50014e+06	1.59642e+06	1.54373e+06	1.50128e+06	1.5372e+06
3(S)6(R)-dihydroxy-tetradec-8Z-enoate/3(S)6(S)-dihydroxy-tetradec-8Z-enoate	4.6082e+07	4.82857e+07	4.94434e+07	4.75428e+07	4.47253e+07	4.82157e+07
3-methyl-2-oxobutanoate	2.06621e+07	2.07375e+07	2.21399e+07	2.07277e+07	2.12688e+07	2.00794e+07
L-tyrosine	2.24881e+08	2.10568e+08	2.12794e+08	2.1287e+08	2.10812e+08	2.1002e+08
L-fucose/L-Fuculose	2.88599e+06	3.0552e+06	3.04024e+06	2.99514e+06	2.79075e+06	2.99595e+06
Xanthine	4.38802e+08	4.39561e+08	4.35547e+08	4.15732e+08	4.31824e+08	437360255
dUMP	1.92719e+06	1.97531e+06	1.95949e+06	1.8182e+06	2.0212e+06	1.91504e+06
dopaminochrome	8.49528e+06	9.05283e+06	1.02779e+07	8.87094e+06	1.05219e+07	7.96044e+06
succinyl carnitine	2.07426e+07	2.25207e+07	2.45185e+07	2.10022e+07	2.45432e+07	2.13099e+07
kynurenate	5.35525e+06	5.62357e+06	5.60246e+06	5.36183e+06	5.63171e+06	5.39057e+06
L-xylonate/L-lyxonate	6.41025e+07	6.29419e+07	6.3112e+07	6.63597e+07	6.05583e+07	6.12787e+07
N(2)-acetyl-L-ornithine	4.17996e+06	4.35966e+06	4.29391e+06	4.33702e+06	4.24082e+06	4.18259e+06
pristanic acid	1.41013e+06	2.44096e+06	1.70866e+06	1.90237e+06	1.92102e+06	1.71565e+06
CDPcholine	3.13831e+06	3.03659e+06	3.48217e+06	3.10239e+06	3.19716e+06	3.36344e+06
UDP-N-acetyl-alpha-D-glucosamine/UDP-N-acetyl-alpha-D-galactosamine	3.57985e+08	3.98561e+08	3.92002e+08	3.90496e+08	3.82753e+08	3.76262e+08
lysyl-proline	119996	148347	136781	139876	127494	139046
L-kynurenine/Formyl-5-hydroxykynurenamine	6.89241e+06	6.42768e+06	6.12711e+06	6.40267e+06	6.19505e+06	6.9228e+06
L-cystathionine	565288	672540	613601	595684	622090	642457
13-carboxy-gama-tocopherol	3.52096e+06	3.48637e+06	3.40107e+06	3.58785e+06	3.51378e+06	3.36631e+06
arginine	7.29779e+08	7.23453e+08	7.38909e+08	7.20402e+08	7.2267e+08	7.62954e+08
quinolinate	1.51073e+06	1.57186e+06	1.34771e+06	1.54775e+06	1.51922e+06	1.39407e+06
glycochenodeoxycholate	1.49047e+07	1.47275e+07	1.52711e+07	1.43945e+07	1.53333e+07	1.55894e+07
4-hydroxy-2-nonenal/3,4-epoxynonanal	2.88197e+06	1.85959e+06	1.95309e+06	2.50919e+06	2.08386e+06	2.17392e+06
Pyridoxine/Norepinephrine-1	5.23971e+08	5.70066e+08	6.62433e+08	5.80297e+08	6.30144e+08	5.67465e+08
(-)-Salsolinol/NN-dimethyldopaminequinone-1	2.07614e+06	1.74941e+06	2.20795e+06	2.17002e+06	1.93947e+06	1.99931e+06
sarcosine	5.95108e+06	7.28236e+06	6.88127e+06	5.45057e+06	7.61237e+06	7.31114e+06
5-methoxytryptophol	1.64621e+06	1.7316e+06	1.67189e+06	1.61356e+06	1.65464e+06	1.86918e+06
gama-L-glutamyl-L-alpha-aminobutyrate	774099	797302	840331	746607	838762	871715
choline phosphate	5804119366	5962249914	5894117062	6114619304	5980711413	5906361157
2-deoxy-D-ribose 5-phosphate/2-Deoxy-D-ribose 1-phosphate	776453	778849	794269	887506	656136	851529
Adrenaline/L-Normetanephrine	1.65208e+07	1.70863e+07	1.84794e+07	1.57944e+07	1.81203e+07	1.92193e+07
beta-D-Fructose 1,6-bisphosphate	8.84692e+06	1.29781e+07	1.22858e+07	1.22685e+07	1.30288e+07	9.51994e+06
L-Iditol/D-glucitol/galactitol	1.38527e+08	1.40653e+08	1.49281e+08	1.5405e+08	140664022	1.42789e+08
creatinine	1666419447	1756887537	1771984812	1731610573	1799652763	1777498253
UDP	6.06993e+07	6.87774e+07	4.94208e+07	6.90656e+07	6.84817e+07	4.52654e+07
caprate	4.62744e+07	4.00659e+07	4.45338e+07	4.76914e+07	4.2371e+07	4.39232e+07
NADP+	712010	710056	689673	812790	826221	526838
acetylcholine/4-(trimethylammonio)butanoate	3.07431e+08	3.10966e+08	3.22348e+08	3.24291e+08	3.19009e+08	3.2282e+08
trans-caffeate/3-(4-hydroxyphenyl)pyruvate	528405	584628	444933	530639	551886	521661
Nicotinamide	2.15096e+08	2.60961e+08	2.79544e+08	2.59634e+08	259601014	2.59584e+08
5-Hydroxyindoleacetate	2.74223e+06	2.89716e+06	2.69264e+06	2.80337e+06	2.71068e+06	3.0744e+06
L-phenylalanine	1229290996	1282546000	1277556337	1272247944	1302916155	1332566459
Ornithine	2.25621e+07	2.22804e+07	2.28207e+07	2.36459e+07	2.23323e+07	2.38279e+07
D-Glycerate 3-phosphate/D-Glycerate 2-phosphate	1.19534e+07	1.3026e+07	13371374	13922581	1.29399e+07	1.277e+07
C5H10O5(6)	5.60645e+06	5.36097e+06	5.85352e+06	6.15067e+06	5.21737e+06	6.03842e+06
5-guanidino-2-oxopentanoic acid	7.01355e+06	6.3689e+06	7.1908e+06	6.75162e+06	6.57676e+06	7.97022e+06
taurolithocholate	1.31929e+06	1.56619e+06	1.61963e+06	1.58637e+06	1.50448e+06	1.57699e+06
L-threonate	4.40219e+08	4.46228e+08	4.37539e+08	4.62371e+08	4.50118e+08	4.61446e+08
Dodecanedioic acid	3.85301e+06	3.47195e+06	4.24561e+06	4.32973e+06	3.77973e+06	3.9107e+06
UDP-D-glucose/UDP-D-galactose	7.90531e+07	8.41235e+07	7.82608e+07	8.87519e+07	8.55457e+07	7.68971e+07
1-methylpyrrolinium	3.56539e+07	3.50601e+07	3.69084e+07	3.75456e+07	3.56494e+07	3.88454e+07
N-Ribosylnicotinamide	2.26584e+06	2.38514e+06	2.52135e+06	2.73427e+06	2.82576e+06	1.93863e+06
5-oxoproline/L-1-Pyrroline-3-hydroxy-5-carboxylate	1501172383	1578337194	1580583987	1597267899	1616506287	1661103204
4,6-Dihydroxyquinoline/quinoline-4,8-diol	184867	228741	197303	183101	237683	220826
oleic acid/elaidate/trans-vaccenate	1.59656e+08	2.01916e+08	1.83598e+08	195333727	194182550	1.83626e+08
Hypotaurine	3.89601e+06	3.73159e+06	3.48069e+06	3.81623e+06	3.72531e+06	4.15419e+06
succinate(2-)	1.71486e+08	1.86879e+08	2.04507e+08	1.94371e+08	1.89139e+08	2.09224e+08
C4H8O3(3)	5.01193e+07	4.87759e+07	4.90372e+07	5.06111e+07	5.28945e+07	5.24499e+07
L-2-aminoadipate	2.56607e+07	2.74559e+07	2.95492e+07	2.54162e+07	3.0466e+07	3.13117e+07
dCTP	179094	287277	255908	252577	313413	196191
L-erythrulose	1.9454e+07	1.88515e+07	1.96938e+07	2.11859e+07	1.92598e+07	2.08707e+07
CMP	779205	1.03834e+06	810994	781173	964264	1.04008e+06
methyl indole-3-acetate	1.24923e+06	1.3889e+06	1.34766e+06	1.39963e+06	1.44158e+06	1.38417e+06
(R)-Pantothenate	1508118677	1563118776	1618976266	1597824046	1677874394	1698434682
Guanine	6.71737e+06	8.7018e+06	9.45086e+06	8.86156e+06	9.00435e+06	8.54135e+06
L-homocysteine	686996	575239	608646	644476	666772	679728
beta-hydroxy-beta-methylbutyrate	5.20601e+06	5.20418e+06	5.20856e+06	5.48901e+06	5.57923e+06	5.55766e+06
Diphosphate	1.83152e+08	1.9384e+08	1.97792e+08	2.12721e+08	1.99385e+08	1.99809e+08
lysine	2.97276e+08	2.96032e+08	3.01312e+08	3.15757e+08	3.09986e+08	326761098
inosine	3.29583e+06	3.36732e+06	3.37056e+06	3.38373e+06	3.59023e+06	3.71797e+06
S-adenosyl-L-methionine	3.14944e+06	3.21125e+06	3.1028e+06	3.64403e+06	3.17059e+06	3.27766e+06
glycolithocholate	99274.5	94284.7	83781.5	106554	91182	98109.3
N-Methylethanolamine phosphate	1.22725e+07	1.22261e+07	1.2278e+07	1.28531e+07	1.29052e+07	1.35083e+07
dTTP	2.23344e+06	2.34531e+06	2.07024e+06	2.68772e+06	2.4907e+06	1.92338e+06
nonanoate	1.26253e+08	8.12835e+07	9.61176e+07	1.12186e+08	101070896	1.11395e+08
UTP	1.40633e+08	149011242	1.17499e+08	1.65536e+08	1.47768e+08	1.22019e+08
2-methylglutaconic acid	3.60507e+07	3.50635e+07	3.64951e+07	3.99884e+07	3.63447e+07	3.8749e+07
C4H6O3(3)	6.65853e+07	6.91985e+07	6.16501e+07	7.00131e+07	6.84303e+07	7.30257e+07
Carbamoyl phosphate	53435.4	93076.7	72653.6	67370.9	91872.5	76067.5
anthranilate	1.88003e+07	1.94862e+07	2.00215e+07	2.14193e+07	2.10126e+07	2.04368e+07
indole-3-acetate/(5-hydroxyindol-3-yl)acetaldehyde	7.76713e+07	8.40648e+07	6.56148e+07	9.28961e+07	79394909	7.28852e+07
laurate	3.81511e+07	4.06159e+07	4.20304e+07	4.81667e+07	4.12933e+07	4.21689e+07
4-Hydroxyphenylacetate/2-Hydroxyphenylacetate/3,4-Dihydroxyphenylacetaldehyde	2.96275e+06	1.86928e+06	2.30879e+06	2.98338e+06	2.46337e+06	2.33949e+06
carnosine	6.11771e+07	6.04436e+07	5.94557e+07	6.44811e+07	6.65656e+07	6.64491e+07
(4-hydroxy-3-methoxyphenyl)acetaldehyde	894413	841715	884429	922354	1.01469e+06	934720
Taurodeoxycholic acid/taurochenodeoxycholate	1.04443e+07	1.27953e+07	1.14199e+07	1.23952e+07	1.34835e+07	1.21439e+07
xanthosine	953580	1.07362e+06	1.48819e+06	1.20086e+06	1.36825e+06	1.29206e+06
alpha-D-glucose	1.0803e+08	105122685	1.08706e+08	1.2284e+08	1.11091e+08	1.21212e+08
9(10)-EpOME/12(13)-EpOME	3.36487e+06	3.83681e+06	3.53608e+06	4.40171e+06	3.65907e+06	3.82518e+06
ATP	4.05739e+08	4.27059e+08	345571779	4.65478e+08	4.17781e+08	4.23378e+08
C20H32O3(12)	1.16841e+06	1.07136e+06	1.18554e+06	1.32271e+06	1.0466e+06	1.43271e+06
estrone 3-sulfate	87301.5	100905	114015	134341	101744	99940.5
Taurine	1960647912	2058051521	2169418703	2390434080	2174485221	2321270584
Riboflavin	1.6622e+07	1.76532e+07	2.239e+07	2.02423e+07	2.20288e+07	2.10114e+07
NADPH	561591	478488	449295	687116	443537	537528
histamine	1.26755e+07	1.2103e+07	1.32713e+07	1.42141e+07	1.26181e+07	1.59115e+07
2-Hydroxyglutarate	1.37359e+07	1.42316e+07	1.51074e+07	1.60759e+07	1.62538e+07	1.63391e+07
adipic acid	4.26882e+06	4.56521e+06	4.43888e+06	5.01354e+06	4.93421e+06	5.05138e+06
Eicosenoic acid	6.88561e+06	8.56752e+06	6.99913e+06	8.31926e+06	8.98607e+06	8.11418e+06
15(S)-Hydroxyeicosatrienoic acid	534021	638015	591825	848715	504740	647048
Biotin	1.01226e+08	1.0454e+08	1.20398e+08	1.13778e+08	1.29196e+08	127431223
phenylacetate/(4-hydroxyphenyl)acetaldehyde	1.02199e+07	9.70214e+06	1.07761e+07	1.20893e+07	1.1554e+07	1.12208e+07
5-Phospho-beta-D-ribosylamine	396019	282334	300967	303771	445641	364274
2-oxoglutarate(2-)	124121411	1.29607e+08	1.1886e+08	1.37977e+08	1.35831e+08	1.53635e+08
3-dehydro-L-gulonate/D-glucuronate/L-iduronate	1.76653e+06	1.75974e+06	1.89279e+06	2.21161e+06	1.80417e+06	2.20243e+06
glycine betaine	1467220470	1483027379	1419967484	1686906688	1676018078	1660477907
Phosphoenolpyruvate	4.74766e+06	5.23453e+06	5.77099e+06	6.32355e+06	5.83467e+06	5.9572e+06
Folate	927959	1.06134e+06	949746	1.11012e+06	1.12382e+06	1.16066e+06
UMP	4.01038e+07	4.77791e+07	5.64155e+07	5.67321e+07	5.93822e+07	5.0865e+07
orotate	5.01952e+06	5.33515e+06	5.65079e+06	6.10547e+06	6.23889e+06	6.22819e+06
N6N6N6-Trimethyl-L-lysine	1.19485e+08	1.21042e+08	1.25305e+08	1.40543e+08	139744001	1.44592e+08
Hexadecanedioic acid	3.82028e+06	3.87013e+06	4.03485e+06	5.467e+06	3.9972e+06	4.19675e+06
9,10-hydroxyoctadec-12(Z)-enoate/12,13-hydroxyoctadec-9(Z)-enoate	5.40571e+06	5.85288e+06	6.0612e+06	8.10661e+06	6.26095e+06	5.93481e+06
erythro-5-hydroxy-L-lysinium	1.48327e+06	1.51143e+06	1.57418e+06	1.79135e+06	1.71363e+06	1.90884e+06
3-Hydroxy-N6N6N6-trimethyl-L-lysine	7.88054e+06	7.96416e+06	8.12414e+06	9.52927e+06	9.24125e+06	9.66401e+06
N-methyl-467-trihydroxy-1234-tetrahydroisoquinoline	795932	846949	957119	930385	1.14622e+06	1.00879e+06
linoleic acid/linoelaidic acid (all trans C18:2)/octadecadienoate (n-C18:2)	1.26357e+07	1.66959e+07	1.51821e+07	1.81785e+07	1.737e+07	1.74067e+07
GMP	1.39164e+06	1.32479e+06	1.41214e+06	1.18555e+06	1.89022e+06	1.84063e+06
3-oxo-6(R)-hydroxy-tetradec-8-cis-enoate/3-oxo-6(S)-hydroxy-tetradec-8Z-enoate	2.63156e+06	2.42058e+06	2.24153e+06	3.37279e+06	2.89727e+06	2.46443e+06
O-Phospho-L-serine	101564	112221	154634	102426	167540	172605
2-aminomuconate	1.96268e+06	1.66482e+06	1.55871e+06	2.17901e+06	2.00346e+06	2.07008e+06
Glycylleucine	1.60058e+06	1.79812e+06	1.91959e+06	2.13187e+06	2.02278e+06	2.29692e+06
CTP	2.87278e+07	3.10283e+07	2.06098e+07	3.91137e+07	3.45639e+07	2.40246e+07
D-Glucosamine 6-phosphate	5.59264e+06	5.98543e+06	6.10984e+06	6.88148e+06	7.23539e+06	7.53096e+06
sn-Glycero-3-phosphocholine	3818254580	3662298573	3818637521	4708304475	4594245238	4531251859
2-phenylethanamine	29996.4	29449.5	27649.6	50786.3	42958	14116.7
N-acetyl-L-aspartate/2-Amino-3-oxoadipate	1.64257e+08	1.64358e+08	1.50473e+08	2.00326e+08	1.85439e+08	2.08672e+08
C14H24O3(4)	1.00993e+06	777203	1.08521e+06	1.41692e+06	1.09314e+06	1.05992e+06
2-oxoadipate	417937	341288	362722	491251	392992	510946
adenine	2.19546e+08	3.30676e+08	4.59242e+08	315105325	4.27021e+08	5.13725e+08
N1,N12-diacetylspermidine	1.42176e+06	1.57878e+06	1.32455e+06	1.60772e+06	1.86024e+06	1.95175e+06
NAD+	2.22349e+07	2.23489e+07	2.53907e+07	2.6858e+07	2.93071e+07	3.15875e+07
serotonin	1.7707e+06	2.14437e+06	2.06988e+06	2.41908e+06	2.65921e+06	2.46012e+06
3-Deoxy-D-glycero-D-galacto-2-nonulosonic acid	6.65738e+06	7.50801e+06	7.19126e+06	9.18831e+06	8.3318e+06	9.43146e+06
CMP-N-trimethyl-2-aminoethylphosphonate	806413	935528	1.12288e+06	1.17125e+06	1.14753e+06	1.3126e+06
UDP-D-glucuronate	6.60931e+07	6.78824e+07	4.85706e+07	1.01091e+08	9.12021e+07	4.1186e+07
(Z)-but-2-ene-123-tricarboxylate	585067	324828	452239	611434	573633	577749
4-nitrophenolate	1.61458e+06	1.35757e+06	1.55588e+06	1.83485e+06	1.86519e+06	2.25178e+06
sphingosine/(2S)-1-hydroxy-3-oxooctadecan-2-aminium	4.04157e+06	6.86188e+06	6.19883e+06	6.53065e+06	6.70343e+06	9.34747e+06
CDP	1.12799e+07	1.36481e+07	8.61289e+06	1.53683e+07	1.4828e+07	1.44345e+07
5-amino-1-(5-phospho-D-ribosyl)imidazole	1.02774e+07	1.41468e+07	1.32343e+07	1.47008e+07	1.65647e+07	1.92435e+07
C27H46O4(3)	2.52929e+06	1.4235e+06	1.44924e+06	1.63808e+06	2.30688e+06	3.40385e+06
guanosine	1.16209e+06	1.3314e+06	1.06425e+06	1.6795e+06	1.60481e+06	1.67327e+06
D-Alanyl-D-alanine	950505	975863	944761	1.27428e+06	1.28286e+06	1.44651e+06
docosahexaenoate(DHA)	1.58194e+07	2.30435e+07	2.15829e+07	3.16536e+07	2.6782e+07	2.60863e+07
clupanodonic acid/docosa-4,7,10,13,16-pentaenoic acid	5.48637e+06	7.77343e+06	7.30139e+06	10506845	9.42602e+06	8.90249e+06
choline	1445497797	1456790404	1509220174	2091802565	2044113726	2065449186
6(S)-hydroxy-tetradeca-2E4E8Z-trienoate/6(R)-hydroxy-tetradeca-2E4E8Z-trienoate	1.50088e+06	1.53292e+06	1.54748e+06	2.37092e+06	1.88022e+06	2.2512e+06
4-pyridoxate	3.12041e+06	3.49859e+06	3.75319e+06	4.8939e+06	4.90108e+06	4.98705e+06
allantoate	28753.4	34375.8	13364.7	16099.1	20588.8	73802.3
D-Glucuronate 1-phosphate	968277	1.30179e+06	1.38338e+06	1.86941e+06	1.85568e+06	1.57963e+06
perillyl aldehyde	1.94441e+06	1.21967e+06	1.52002e+06	3.03303e+06	1.86638e+06	1.96589e+06
11'-Carboxy-alpha-chromanol	391785	387133	455570	1.03111e+06	381551	398180
5-S-glutathionyl-dopamine	187442	54917.4	38554.6	112085	252502	47861.5
8,11,14-Eicosatrienoic acid (DGLA)	3.76458e+06	5.01849e+06	4.55316e+06	6.88343e+06	6.32531e+06	6.46023e+06
beta-carboline	201765	101255	202135	276517	287723	197435
limonene/(+)-alpha-pinene	1.53421e+06	899469	1.29699e+06	2.63584e+06	1.44358e+06	1.57347e+06
Methylisocitric acid/2-methylcitrate	8.21076e+06	8.72696e+06	8.77712e+06	1.32438e+07	1.31391e+07	1.29416e+07
arachidonic acid	1.99793e+07	2.73116e+07	2.28799e+07	4.08265e+07	3.33637e+07	3.38436e+07
3-hydroxyanthranilate	99388.1	113948	110130	174353	160345	164874
adenosine	6.4106e+06	6.28753e+06	5.22242e+06	1.01817e+07	8.87537e+06	8.71043e+06
C20H30O2(4)	3.88289e+06	4.57794e+06	4.84932e+06	7.82194e+06	6.49915e+06	6.70814e+06
Hypoxanthine	3.70173e+07	3.56489e+07	3.78807e+07	5.72669e+07	5.88931e+07	5.99082e+07
Galactosylglycerol	198126	407053	410610	380715	488840	790005
pyruvate	1.67801e+07	2.44842e+07	1.48367e+07	3.67131e+07	23677870	3.26329e+07
4-Nitrophenyl sulfate	443307	570101	582105	816426	977591	965617
cytidine	5.6182e+06	5.26496e+06	5.83906e+06	9.80664e+06	1.02045e+07	1.02182e+07
ADP-ribose	2.56167e+06	3.82448e+06	5.01518e+06	4.46417e+06	5.27576e+06	1.12779e+07
uridine	4.65186e+06	4.31158e+06	4.29855e+06	9.18715e+06	9.22046e+06	9.05333e+06
5-O-phosphonato-alpha-D-ribofuranosyl diphosphate	72747.3	70180.2	34383.1	170217	142680	88791.9
4-trimethylammoniobutanal	0	0	0	0	0	0
Xanthurenic acid	0	0	0	0	0	0
oxalate	0	0	0	0	0	0
C3H4O2(3)	0	0	0	0	0	0
2-hydroxyamino-MeIQx-N2-(beta-1-glucosiduronyl)-2-hydroxyamino-3-8-dimethylimidazo[4-5-f]quinoxaline	0	0	0	0	0	0
13-carboxy-alpha-tocopherol	0	0	0	0	0	0
3-oxopropanoate	0	0	0	0	0	0
Ercalcitriol	0	0	0	0	0	0
dTMP	0	0	0	0	0	0
dATP	0	0	0	0	0	0
